# Supplementary material for: Do Individual and Neighborhood Characteristics Influence Perceived Air Quality?
Source: MDPI journal article supplement (doi:10.3390/ijerph14121559), 2017-12-12
Supplement: s1 [file s1]

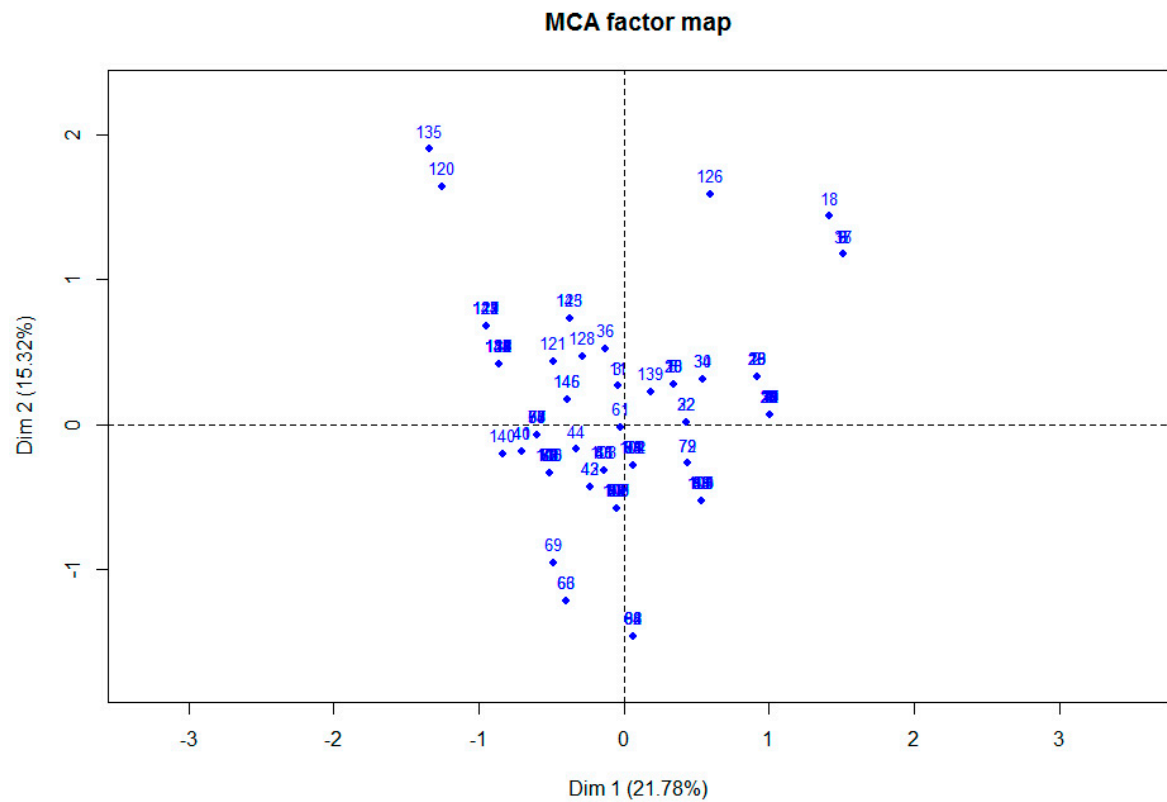

**Figure S1:** MCA factor map in two-dimensions (Dim1 x Dim2) among the young population.

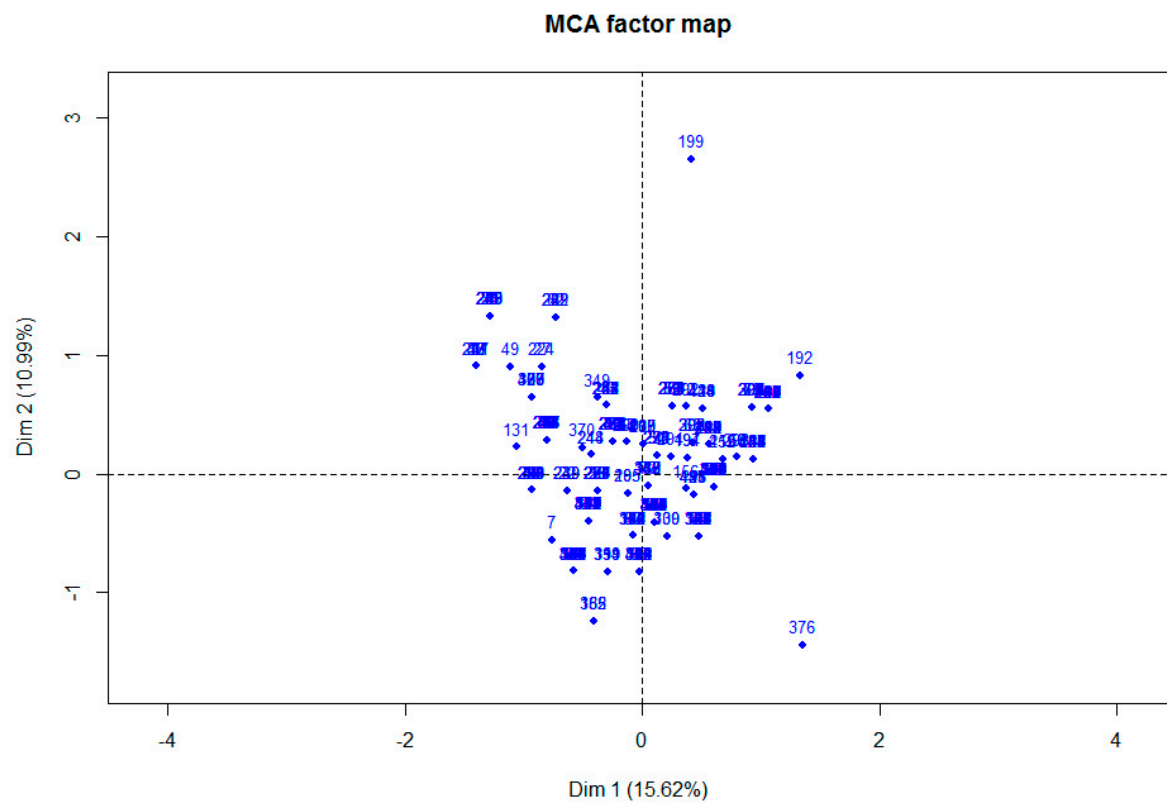

**Figure S2:** MCA factor map in two-dimensions (Dim1 x Dim2) among the middle-age population.

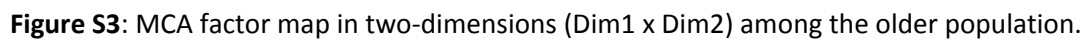

**Table S1a:** Description of the **profile 1** among the youngest (18–29 years)

| <b>Variable:</b> <i>modality</i>                                                 | Cla/Mod <sup>‡</sup> | Mod/Cla <sup>¥</sup> | Global <sup>§</sup> | <i>p</i> value |
|----------------------------------------------------------------------------------|----------------------|----------------------|---------------------|----------------|
| <b>Travel mean:</b> <i>Car</i>                                                   | 55.81                | 77.42                | 29.45               | <0.00001       |
| <b>Perceived Air quality:</b> <i>Totally agree</i>                               | 58.33                | 67.74                | 24.66               | <0.00001       |
| <b>Housing:</b> <i>House</i>                                                     | 57.14                | 51.61                | 19.18               | <0.00001       |
| <b>Satisfaction with the residential place:</b> <i>Totally agree</i>             | 36.92                | 77.42                | 44.52               | <0.0001        |
| <b>Living in another place:</b> <i>No</i>                                        | 32.10                | 83.87                | 55.48               | <0.001         |
| <b>Gender:</b> <i>Man</i>                                                        | 32.43                | 77.42                | 50.68               | <0.001         |
| <b>Work location:</b> <i>In a municipality not in the Rhône-Alpes department</i> | 39.53                | 54.84                | 29.45               | <0.001         |
| <b>Work location:</b> <i>Other place of work</i>                                 | 100.00               | 12.90                | 2.74                | <0.01          |
| <b>Occupational status:</b> <i>Employed</i>                                      | 32.81                | 67.74                | 43.84               | <0.01          |
| <b>Number years living in Lyon:</b> <i>&gt;10 years</i>                          | 27.78                | 80.65                | 61.64               | <0.05          |
| <b>Respiratory health problem:</b> <i>No</i>                                     | 25.47                | 87.10                | 72.60               | <0.05          |
| <b>Level of Education:</b> <i>Baccalaureat</i>                                   | 0.00                 | 0.00                 | 10.27               | <0.05          |
| <b>Heating mode:</b> <i>Electric</i>                                             | 10.20                | 16.13                | 33.56               | <0.05          |
| <b>Respiratory health problem:</b> <i>Yes</i>                                    | 7.69                 | 9.68                 | 26.71               | <0.05          |
| <b>Number years living in Lyon:</b> <i>5–9 years</i>                             | 3.85                 | 3.23                 | 17.81               | <0.05          |
| <b>Work location:</b> <i>In the municipality of residence</i>                    | 11.27                | 25.81                | 48.63               | <0.01          |
| <b>Living in another place:</b> <i>Yes</i>                                       | 8.77                 | 16.13                | 39.04               | <0.01          |

|                                                |      |      |       |       |
|------------------------------------------------|------|------|-------|-------|
| <b>Perceived Air quality:</b> <i>Not agree</i> | 5.13 | 6.45 | 26.71 | <0.01 |
|------------------------------------------------|------|------|-------|-------|

**Table S1b:** Description of the **profile 2** among the youngest (18–29 years)

| <b>Variable:</b> <i>modality</i>                                 | Cla/Mod <sup>φ</sup> | Mod/Cla <sup>¥</sup> | Global <sup>\$</sup> | <i>p</i> value |
|------------------------------------------------------------------|----------------------|----------------------|----------------------|----------------|
| <b>Living in another place:</b> <i>Yes</i>                       | 61.40                | 81.40                | 39.04                | <0.00001       |
| <b>Occupational status:</b> <i>Employed</i>                      | 56.25                | 83.72                | 43.84                | <0.00001       |
| <b>Number years living in Lyon:</b> <i>5–9 years</i>             | 76.92                | 46.51                | 17.81                | <0.00001       |
| <b>Housing:</b> <i>Apartment</i>                                 | 36.44                | 100.00               | 80.82                | <0.0001        |
| <b>Travel mean:</b> <i>Bicycle</i>                               | 84.62                | 25.58                | 8.90                 | <0.0001        |
| <b>Perceived Air quality:</b> <i>not agree</i>                   | 56.41                | 51.16                | 26.71                | <0.0001        |
| <b>Family status:</b> <i>Live with partner without children</i>  | 65.22                | 34.88                | 15.75                | <0.001         |
| <b>Satisfaction with the residential place:</b> <i>Not agree</i> | 100.00               | 16.28                | 4.79                 | <0.001         |
| <b>Level of education:</b> <i>High</i>                           | 61.11                | 25.58                | 12.33                | <0.01          |
| <b>Family status:</b> <i>Live alone without children</i>         | 57.89                | 25.58                | 13.01                | <0.01          |
| <b>Occupation:</b> <i>Tradespeople-Shopkeepers</i>               | 100.00               | 9.30                 | 2.74                 | <0.01          |
| <b>Occupation:</b> <i>Employees</i>                              | 50.00                | 34.88                | 20.55                | <0.01          |
| <b>Level of education:</b> <i>Low</i>                            | 6.25                 | 2.33                 | 10.96                | <0.05          |
| <b>Occupational status:</b> <i>Unemployed</i>                    | 0.00                 | 0.00                 | 8.22                 | <0.05          |
| <b>Level of education:</b> <i>Baccalaureat</i>                   | 0.00                 | 0.00                 | 8.22                 | <0.05          |

|                                                                      |       |       |       |        |
|----------------------------------------------------------------------|-------|-------|-------|--------|
| <b>Satisfaction with the residential place:</b> <i>Totally agree</i> | 15.38 | 23.26 | 44.52 | <0.001 |
| <b>Occupational status:</b> <i>Student</i>                           | 12.07 | 16.28 | 39.73 | <0.001 |
| <b>Perceived Air quality:</b> <i>Totally agree</i>                   | 5.56  | 4.65  | 24.66 | <0.001 |

**Table S1c:** Description of the **profile 3** among the youngest (18–29 years)

| <b>Variable:</b> <i>modality</i>                              | Cla/Mod <sup>♢</sup> | Mod/Cla <sup>¥</sup> | Global <sup>§</sup> | <i>p</i> value |
|---------------------------------------------------------------|----------------------|----------------------|---------------------|----------------|
| <b>Occupational status:</b> <i>Student</i>                    | 70.69                | 85.42                | 39.73               | <0.00001       |
| <b>Family status:</b> <i>With parent</i>                      | 56.96                | 93.75                | 54.11               | <0.00001       |
| <b>Occupation:</b> <i>Missing value</i>                       | 59.42                | 85.42                | 47.26               | <0.00001       |
| <b>Travel mean:</b> <i>Public transport</i>                   | 63.46                | 68.75                | 35.62               | <0.00001       |
| <b>Number years living in Lyon :</b> <i>&gt;10 years</i>      | 46.67                | 87.50                | 61.64               | <0.00001       |
| <b>Work location:</b> <i>In the municipality of residence</i> | 50.70                | 75.00                | 48.63               | <0.00001       |
| <b>Level of education:</b> <i>Low</i>                         | 75.00                | 25.00                | 10.96               | <0.001         |
| <b>Level of education:</b> <i>Baccalaureat</i>                | 73.33                | 22.92                | 10.27               | <0.001         |
| <b>Respiratory health problem:</b> <i>Yes</i>                 | 48.72                | 39.58                | 26.71               | <0.05          |
| <b>Travel mean:</b> <i>Bicycle</i>                            | 7.69                 | 2.08                 | 8.90                | <0.05          |
| <b>Level of education:</b> <i>High</i>                        | 11.11                | 4.17                 | 12.33               | <0.05          |
| <b>Occupation:</b> <i>Employee</i>                            | 16.67                | 10.42                | 20.55               | <0.05          |

|                                                                 |       |       |       |         |
|-----------------------------------------------------------------|-------|-------|-------|---------|
| <b>Respiratory health problem:</b> <i>No</i>                    | 27.36 | 60.42 | 72.60 | <0.05   |
| <b>Occupation:</b> <i>Manual worker</i>                         | 6.67  | 2.08  | 10.27 | <0.05   |
| <b>Occupation:</b> <i>Manager</i>                               | 0.00  | 0.00  | 7.53  | <0.05   |
| <b>Occupation:</b> <i>Non-manual worker</i>                     | 5.88  | 2.08  | 11.64 | <0.01   |
| <b>Occupational status:</b> <i>unemployed</i>                   | 0.00  | 0.00  | 8.22  | <0.01   |
| <b>Travel mean:</b> <i>Car</i>                                  | 16.28 | 14.58 | 29.45 | <0.01   |
| <b>Living in another place:</b> <i>Yes</i>                      | 19.30 | 22.92 | 39.04 | <0.01   |
| <b>Family status:</b> <i>Live alone without children</i>        | 5.26  | 2.08  | 13.01 | <0.01   |
| <b>Family status:</b> <i>Live with partner with children</i>    | 0.00  | 0.00  | 12.33 | <0.001  |
| <b>Number years living in Lyon:</b> <i>5–9 years</i>            | 3.85  | 2.08  | 17.81 | <0.001  |
| <b>Family status:</b> <i>Live with partner without children</i> | 0.00  | 0.00  | 15.75 | <0.0001 |

**Table S1d:** Description of the **profile 4** among the youngest (18–29 years)

| <b>Variable: modality</b>                                                    | <b>Cla/Mod<sup>‡</sup></b> | <b>Mod/Cla<sup>‡</sup></b> | <b>Global<sup>§</sup></b> | <b>p value</b> |
|------------------------------------------------------------------------------|----------------------------|----------------------------|---------------------------|----------------|
| <b>Work location: Missing value</b>                                          | 100.00                     | 100.00                     | 16.44                     | <0.00001       |
| <b>Travel mean: Missing value</b>                                            | 96.00                      | 100.00                     | 17.12                     | <0.00001       |
| <b>Occupational status: Unemployed</b>                                       | 100.00                     | 50.00                      | 8.22                      | <0.00001       |
| <b>Occupational status: Inactive</b>                                         | 100.00                     | 16.67                      | 2.74                      | <0.001         |
| <b>Family status: Live with partner with children</b>                        | 44.44                      | 33.33                      | 12.33                     | <0.001         |
| <b>Level of education: Baccalaureat</b>                                      | 50.00                      | 25.00                      | 8.22                      | <0.01          |
| <b>Level of education: Low</b>                                               | 57.14                      | 16.67                      | 4.79                      | <0.05          |
| <b>Occupation: Manual worker</b>                                             | 40.00                      | 25.00                      | 10.27                     | <0.05          |
| <b>Perceived Air quality: Somewhat agree</b>                                 | 24.24                      | 66.67                      | 45.21                     | <0.05          |
| <b>Family status: Live alone without children</b>                            | 0.00                       | 0.00                       | 13.01                     | <0.05          |
| <b>Heating mode: Gas</b>                                                     | 9.76                       | 33.33                      | 56.16                     | <0.05          |
| <b>Travel mean: Car</b>                                                      | 0.00                       | 0.00                       | 29.45                     | <0.00001       |
| <b>Location of work: In a municipality not in the Rhône-Alpes department</b> | 0.00                       | 0.00                       | 29.45                     | <0.00001       |
| <b>Travel mean: Public transport</b>                                         | 0.00                       | 0.00                       | 35.62                     | <0.00001       |
| <b>Occupational status: Student</b>                                          | 0.00                       | 0.00                       | 39.73                     | <0.00001       |
| <b>Occupational status: Employed</b>                                         | 0.00                       | 0.00                       | 43.84                     | <0.00001       |

|                                                                |      |      |       |          |
|----------------------------------------------------------------|------|------|-------|----------|
| <b>Location of work:</b> <i>In my residential municipality</i> | 0.00 | 0.00 | 48.63 | <0.00001 |
|----------------------------------------------------------------|------|------|-------|----------|

Legend: <sup>φ</sup> Percentage of individuals with the modality belonging to the profile; <sup>¥</sup> Percentage of individuals of the profile with the modality; <sup>§</sup> Percentage of the modality among the oldest.

**Table S2a:** Description of the **profile 1** among the middle age (ages 30 to 59)

| <b>Variable:</b> <i>modality</i>                                                 | Cla/Mod <sup>φ</sup> | Mod/Cla <sup>¥</sup> | Global <sup>§</sup> | <i>p</i> value |
|----------------------------------------------------------------------------------|----------------------|----------------------|---------------------|----------------|
| <b>Travel mean:</b> <i>Car</i>                                                   | 50.53                | 79.34                | 40.51               | <0.00001       |
| <b>Occupation:</b> <i>Manager</i>                                                | 68.42                | 53.72                | 20.26               | <0.00001       |
| <b>Occupational status:</b> <i>Employed</i>                                      | 33.52                | 100.00               | 76.97               | <0.00001       |
| <b>Level of education:</b> <i>High</i>                                           | 50.00                | 48.76                | 25.16               | <0.00001       |
| <b>Housing:</b> <i>House</i>                                                     | 47.29                | 50.41                | 27.51               | <0.00001       |
| <b>Work location:</b> <i>In a municipality not in the Rhône-Alpes department</i> | 41.46                | 56.20                | 34.97               | <0.00001       |
| <b>Work location:</b> <i>Other place of work</i>                                 | 70.83                | 14.05                | 5.12                | <0.00001       |
| <b>Knowledge about air quality:</b> <i>Yes</i>                                   | 38.22                | 49.59                | 33.48               | <0.0001        |
| <b>Gender:</b> <i>Man</i>                                                        | 35.50                | 58.68                | 42.64               | <0.0001        |
| <b>Level of education:</b> <i>Intermediate</i>                                   | 48.78                | 16.53                | 8.74                | <0.001         |
| <b>Travel mean:</b> <i>Motorbike</i>                                             | 85.71                | 4.96                 | 1.49                | <0.01          |
| <b>Living in another place:</b> <i>No</i>                                        | 31.20                | 68.60                | 56.72               | <0.01          |
| <b>Family status:</b> <i>Live with partner with children</i>                     | 31.71                | 64.46                | 52.45               | <0.01          |
| <b>Occupation:</b> <i>Tradespeople-Shopkeepers</i>                               | 54.55                | 9.92                 | 4.69                | <0.01          |



|                                                                      |       |       |       |          |
|----------------------------------------------------------------------|-------|-------|-------|----------|
| <b>Satisfaction with the residential place:</b> <i>Totally agree</i> | 32.80 | 50.41 | 39.66 | <0.01    |
| <b>Perceived Air quality:</b> <i>Totally agree</i>                   | 37.36 | 28.10 | 19.40 | <0.01    |
| <b>Occupational status:</b> <i>Retired</i>                           | 0.00  | 0.00  | 2.99  | <0.05    |
| <b>Living in another place:</b> <i>Yes</i>                           | 18.92 | 28.93 | 39.45 | <0.01    |
| <b>Level of education:</b> <i>Baccalaureat</i>                       | 7.50  | 2.48  | 8.53  | <0.01    |
| <b>Family status:</b> <i>Live alone without children</i>             | 11.43 | 6.61  | 14.93 | <0.01    |
| <b>Perceived Air quality:</b> <i>Not agree</i>                       | 14.81 | 16.53 | 28.78 | <0.001   |
| <b>Satisfaction with the residential place:</b> <i>Not agree</i>     | 2.78  | 0.83  | 7.68  | <0.001   |
| <b>Occupation:</b> <i>Manual worker</i>                              | 7.94  | 4.13  | 13.43 | <0.001   |
| <b>Level of education:</b> <i>Low</i>                                | 10.23 | 7.44  | 18.76 | <0.0001  |
| <b>Travel mean:</b> <i>Public transport</i>                          | 1.52  | 0.83  | 14.07 | <0.00001 |
| <b>Housing:</b> <i>Apartment</i>                                     | 17.40 | 48.76 | 72.28 | <0.00001 |
| <b>Occupation:</b> <i>Employee</i>                                   | 1.77  | 1.65  | 24.09 | <0.00001 |

**Table S2b:** Description of the **profile 2** among the middle age (ages 30 to 59)

| <b>Variable: modality</b>                                             | <b>Cla/Mod <sup>φ</sup></b> | <b>Mod/Cla <sup>¥</sup></b> | <b>Global <sup>§</sup></b> | <b>p value</b> |
|-----------------------------------------------------------------------|-----------------------------|-----------------------------|----------------------------|----------------|
| <b>Work location:</b> <i>In the municipality of residence</i>         | 63.43                       | 68.55                       | 28.57                      | <0.00001       |
| <b>Housing:</b> <i>House</i>                                          | 35.40                       | 96.77                       | 72.28                      | <0.00001       |
| <b>Occupational status:</b> <i>Employed</i>                           | 33.80                       | 98.39                       | 76.97                      | <0.00001       |
| <b>Perceived Air quality:</b> <i>Not agree</i>                        | 49.63                       | 54.03                       | 28.78                      | <0.00001       |
| <b>Living in another place:</b> <i>Yes</i>                            | 43.78                       | 65.32                       | 39.45                      | <0.00001       |
| <b>Travel mean:</b> <i>By foot</i>                                    | 64.10                       | 20.16                       | 8.32                       | <0.00001       |
| <b>Occupation:</b> <i>Non-manual worker</i>                           | 45.05                       | 40.32                       | 23.67                      | <0.00001       |
| <b>Satisfaction with the residential place:</b> <i>Somewhat agree</i> | 35.37                       | 70.16                       | 52.45                      | <0.00001       |
| <b>Satisfaction with the residential place:</b> <i>Not agree</i>      | 58.33                       | 16.94                       | 7.68                       | <0.0001        |
| <b>Level of education:</b> <i>Intermediate</i>                        | 43.16                       | 33.06                       | 20.26                      | <0.0001        |
| <b>Travel mean:</b> <i>Public transport</i>                           | 46.97                       | 25.00                       | 14.07                      | <0.001         |
| <b>Travel mean:</b> <i>Bicycle</i>                                    | 65.00                       | 10.48                       | 4.26                       | <0.001         |
| <b>Respiratory health problem:</b> <i>Yes</i>                         | 37.19                       | 36.29                       | 25.80                      | <0.01          |
| <b>Level of education:</b> <i>Baccalaureat</i>                        | 83.33                       | 4.03                        | 1.28                       | <0.01          |
| <b>Occupational status:</b> <i>Retired</i>                            | 0.00                        | 0.00                        | 2.99                       | <0.05          |
| <b>Level of education:</b> <i>Low</i>                                 | 4.17                        | 0.81                        | 5.12                       | <0.01          |
| <b>Respiratory health problem:</b> <i>No</i>                          | 22.67                       | 62.90                       | 73.35                      | <0.01          |

|                                                                              |       |       |       |          |
|------------------------------------------------------------------------------|-------|-------|-------|----------|
| <b>Heating mode:</b> <i>Wood</i>                                             | 0.00  | 0.00  | 5.12  | <0.001   |
| <b>Work location:</b> <i>In a municipality of the Rhône-Alpes department</i> | 15.85 | 20.97 | 34.97 | <0.001   |
| <b>Occupational status:</b> <i>Unemployed</i>                                | 0.00  | 0.00  | 8.53  | <0.00001 |
| <b>Occupational status:</b> <i>Inactive</i>                                  | 0.00  | 0.00  | 9.17  | <0.00001 |
| <b>Living in another place:</b> <i>No</i>                                    | 13.91 | 29.84 | 56.72 | <0.00001 |
| <b>Satisfaction with the residential place:</b> <i>Totally agree</i>         | 8.60  | 12.90 | 39.66 | <0.00001 |
| <b>Perceived Air quality:</b> <i>Totally agree</i>                           | 0.00  | 0.00  | 19.40 | <0.00001 |
| <b>Housing:</b> <i>House</i>                                                 | 3.10  | 3.23  | 27.51 | <0.00001 |

**Table S2c:** Description of the **profile 3** among the middle age (ages 30 to 59)

| <b>Variable: modality</b>                                     | Cla/Mod <sup>φ</sup> | Mod/Cla <sup>¥</sup> | Global <sup>§</sup> | <i>p</i> value |
|---------------------------------------------------------------|----------------------|----------------------|---------------------|----------------|
| <b>Occupation:</b> <i>Employee</i>                            | 61.06                | 57.02                | 24.09               | <0.00001       |
| <b>Occupational status:</b> <i>Employed</i>                   | 32.69                | 97.52                | 76.97               | <0.00001       |
| <b>Work location:</b> <i>In the municipality of residence</i> | 42.68                | 57.85                | 34.97               | <0.00001       |
| <b>Work location:</b> <i>At home</i>                          | 68.75                | 18.18                | 6.82                | <0.00001       |
| <b>Living in another place:</b> <i>No</i>                     | 34.59                | 76.03                | 56.72               | <0.00001       |
| <b>Level of education:</b> <i>Low</i>                         | 47.73                | 34.71                | 18.76               | <0.00001       |
| <b>Occupation:</b> <i>Manual worker</i>                       | 52.38                | 27.27                | 13.43               | <0.00001       |

|                                                                       |       |       |       |          |
|-----------------------------------------------------------------------|-------|-------|-------|----------|
| <b>Travel mean: <i>Public transport</i></b>                           | 51.52 | 28.10 | 14.07 | <0.00001 |
| <b>Level of education: <i>Baccalaureat</i></b>                        | 60.00 | 19.83 | 8.53  | <0.00001 |
| <b>Satisfaction with the residential place: <i>Totally agree</i></b>  | 37.10 | 57.02 | 39.66 | <0.00001 |
| <b>Perceived Air quality: <i>Totally agree</i></b>                    | 43.96 | 33.06 | 19.40 | <0.0001  |
| <b>Heating mode: <i>Other</i></b>                                     | 70.59 | 9.92  | 3.62  | <0.001   |
| <b>Respiratory health problem: <i>No</i></b>                          | 29.36 | 83.47 | 73.35 | <0.01    |
| <b>Work location: <i>Other place of work</i></b>                      | 4.17  | 0.83  | 5.12  | <0.01    |
| <b>Respiratory health problem: <i>Yes</i></b>                         | 15.70 | 15.70 | 25.80 | <0.01    |
| <b>Level of education: <i>Intermediate</i></b>                        | 12.63 | 9.92  | 20.26 | <0.001   |
| <b>Occupational status: <i>Unemployed</i></b>                         | 5.00  | 1.65  | 8.53  | <0.001   |
| <b>Satisfaction with the residential place: <i>Somewhat agree</i></b> | 19.11 | 38.84 | 52.45 | <0.001   |
| <b>Occupation: <i>non manual worker</i></b>                           | 12.61 | 11.57 | 23.67 | <0.001   |
| <b>Occupational status: <i>Inactive</i></b>                           | 0.00  | 0.00  | 9.17  | <0.00001 |
| <b>Living in another place: <i>Yes</i></b>                            | 13.51 | 20.66 | 39.45 | <0.00001 |
| <b>Perceived Air quality: <i>Not agree</i></b>                        | 9.63  | 10.74 | 28.78 | <0.00001 |
| <b>Level of education: <i>High</i></b>                                | 7.63  | 7.44  | 25.16 | <0.00001 |
| <b>Occupation: <i>Manager</i></b>                                     | 2.11  | 1.65  | 20.26 | <0.00001 |

**Table S2d:** Description of the **profile 4** among the middle age (ages 30 to 59)

| <b>Variable: modality</b>                 | <b>Cla/Mod <sup>φ</sup></b> | <b>Mod/Cla <sup>¥</sup></b> | <b>Global <sup>§</sup></b> | <b>p value</b> |
|-------------------------------------------|-----------------------------|-----------------------------|----------------------------|----------------|
| <b>Work location: Missing value</b>       | 96.23                       | 100.00                      | 22.60                      | <0.00001       |
| <b>Travel mean: Missing value</b>         | 74.45                       | 100.00                      | 29.21                      | <0.00001       |
| <b>Occupation: Missing value</b>          | 93.85                       | 59.80                       | 13.86                      | <0.00001       |
| <b>Occupational status: Inactive</b>      | 100.00                      | 42.16                       | 9.17                       | <0.00001       |
| <b>Occupational status: Unemployed</b>    | 95.00                       | 37.25                       | 8.53                       | <0.00001       |
| <b>Occupational status: Retired</b>       | 100.00                      | 13.73                       | 2.99                       | <0.00001       |
| <b>Level of education: Low</b>            | 54.17                       | 12.75                       | 5.12                       | <0.001         |
| <b>Knowledge about air quality: Yes</b>   | 15.29                       | 23.53                       | 33.48                      | <0.05          |
| <b>Travel mean: Bicycle</b>               | 0.00                        | 0.00                        | 4.26                       | <0.01          |
| <b>Work location: Other place of work</b> | 0.00                        | 0.00                        | 5.12                       | <0.01          |
| <b>Work location: At home</b>             | 0.00                        | 0.00                        | 6.82                       | <0.001         |
| <b>Occupation: Non-manual worker</b>      | 9.01                        | 9.80                        | 23.67                      | <0.0001        |
| <b>Travel mean: By foot</b>               | 0.00                        | 0.00                        | 8.32                       | <0.0001        |
| <b>Occupation: Manager</b>                | 7.37                        | 6.86                        | 20.26                      | <0.0001        |
| <b>Occupation: Employee</b>               | 6.19                        | 6.86                        | 24.09                      | <0.00001       |
| <b>Travel mean: Public transport</b>      | 0.00                        | 0.00                        | 14.07                      | <0.00001       |

|                                                                              |      |      |       |          |
|------------------------------------------------------------------------------|------|------|-------|----------|
| <b>Work location:</b> <i>In the municipality of residence</i>                | 0.00 | 0.00 | 28.57 | <0.00001 |
| <b>Work location:</b> <i>In a municipality of the Rhône-Alpes department</i> | 0.00 | 0.00 | 34.97 | <0.00001 |
| <b>Travel mean:</b> <i>Car</i>                                               | 0.00 | 0.00 | 40.51 | <0.00001 |
| <b>Occupational status:</b> <i>Employed</i>                                  | 0.00 | 0.00 | 76.97 | <0.00001 |

Legend: <sup>‡</sup> Percentage of individuals with the modality belonging to the profile; <sup>¥</sup> Percentage of individuals of the profile with the modality; <sup>§</sup> Percentage of the modality among the oldest.

**Table S3a:** Description of the **profile 1** among the oldest ( $\geq 60$  years)

| <b>Variable:</b> <i>modality</i>                     | Cla/Mod <sup>‡</sup> | Mod/Cla <sup>¥</sup> | Global <sup>§</sup> | <i>p</i> value |
|------------------------------------------------------|----------------------|----------------------|---------------------|----------------|
| <b>Work location:</b> <i>Missing value</i>           | 100.00               | 100.00               | 91.05               | <0.00001       |
| <b>Occupation:</b> <i>Missing value</i>              | 100.00               | 99.71                | 90.79               | <0.00001       |
| <b>Travel mean:</b> <i>Missing value</i>             | 99.14                | 100.00               | 91.84               | <0.00001       |
| <b>Occupational status:</b> <i>Retired</i>           | 100.00               | 93.35                | 85.00               | <0.00001       |
| <b>Level of education:</b> <i>Low</i>                | 98.39                | 17.63                | 16.32               | <0.05          |
| <b>Perceived Air quality:</b> <i>Totally agree</i>   | 94.06                | 59.54                | 57.63               | <0.05          |
| <b>Perceived Air quality:</b> <i>Somewhat agree</i>  | 86.33                | 34.68                | 36.58               | <0.05          |
| <b>Work location:</b> <i>At home</i>                 | 0.00                 | 0.00                 | 0.79                | <0.001         |
| <b>Occupation:</b> <i>Tradespeople - Shopkeepers</i> | 0.00                 | 0.00                 | 0.79                | <0.001         |
| <b>Work location:</b> <i>other place of work</i>     | 0.00                 | 0.00                 | 1.32                | <0.00001       |

|                                                                                  |       |      |      |          |
|----------------------------------------------------------------------------------|-------|------|------|----------|
| <b>Work location:</b> <i>In a municipality not in the Rhône-Alpes department</i> | 0.00  | 0.00 | 1.58 | <0.00001 |
| <b>Occupation:</b> <i>Manual worker</i>                                          | 0.00  | 0.00 | 1.58 | <0.00001 |
| <b>Occupation:</b> <i>Non-manual worker</i>                                      | 12.50 | 0.29 | 2.11 | <0.00001 |
| <b>Travel mean:</b> <i>Public transport</i>                                      | 0.00  | 0.00 | 2.11 | <0.00001 |
| <b>Travel mean:</b> <i>by foot</i>                                               | 0.00  | 0.00 | 2.11 | <0.00001 |
| <b>Occupation:</b> <i>Employee</i>                                               | 0.00  | 0.00 | 2.11 | <0.00001 |
| <b>Occupation:</b> <i>Manager</i>                                                | 0.00  | 0.00 | 2.63 | <0.00001 |
| <b>Travel mean:</b> <i>Car</i>                                                   | 0.00  | 0.00 | 3.42 | <0.00001 |
| <b>Work location:</b> <i>In the municipality of residence</i>                    | 0.00  | 0.00 | 5.00 | <0.00001 |
| <b>Occupational status:</b> <i>Employed</i>                                      | 0.00  | 0.00 | 8.95 | <0.00001 |

**Table S3b:** Description of the **profile 2** among the oldest ( $\geq 60$  years)

| <b>Variable: modality</b>                                            | <b>Cla/Mod <sup>†</sup></b> | <b>Mod/Cla <sup>‡</sup></b> | <b>Global <sup>§</sup></b> | <b>p value</b> |
|----------------------------------------------------------------------|-----------------------------|-----------------------------|----------------------------|----------------|
| <b>Satisfaction with the residential place: <i>Totally agree</i></b> | 48.96                       | 94.95                       | 59.44                      | <0.00001       |
| <b>Perceived Air quality: <i>Totally agree</i></b>                   | 72.84                       | 59.60                       | 25.08                      | <0.00001       |
| <b>Living in another place: <i>No</i></b>                            | 35.13                       | 98.99                       | 86.38                      | <0.00001       |
| <b>Cardiovascular health problem: <i>No</i></b>                      | 36.58                       | 94.95                       | 79.57                      | <0.00001       |
| <b>Respiratory health problem: <i>No</i></b>                         | 37.07                       | 86.87                       | 71.83                      | <0.0001        |
| <b>Level of education: <i>Low</i></b>                                | 55.10                       | 27.27                       | 15.17                      | <0.001         |
| <b>Knowledge about air quality: <i>No</i></b>                        | 34.85                       | 92.93                       | 81.73                      | <0.001         |
| <b>Level of education: <i>Baccalaureat</i></b>                       | 87.50                       | 7.07                        | 2.48                       | <0.01          |
| <b>Heating mode: <i>Other</i></b>                                    | 71.43                       | 10.10                       | 4.33                       | <0.01          |
| <b>Heating mode: <i>Electric</i></b>                                 | 17.81                       | 13.13                       | 22.60                      | <0.01          |
| <b>Satisfaction with the residential place: <i>Not agree</i></b>     | 0.00                        | 0.00                        | 4.33                       | <0.01          |
| <b>Family status: <i>With partner with children</i></b>              | 0.00                        | 0.00                        | 5.57                       | <0.01          |
| <b>Perceived Air quality: <i>Not agree</i></b>                       | 10.53                       | 6.06                        | 17.65                      | <0.001         |
| <b>Knowledge about air quality: <i>Yes</i></b>                       | 8.77                        | 5.05                        | 17.65                      | <0.0001        |
| <b>Respiratory health problem: <i>Yes</i></b>                        | 13.33                       | 12.12                       | 27.86                      | <0.0001        |
| <b>Living in another place: <i>Yes</i></b>                           | 2.63                        | 1.01                        | 11.76                      | <0.00001       |



|                                                                       |       |       |       |          |
|-----------------------------------------------------------------------|-------|-------|-------|----------|
| <b>Level of education:</b> <i>Low</i>                                 | 6.78  | 4.04  | 18.27 | <0.00001 |
| <b>Cardiovascular health problem:</b> <i>Yes</i>                      | 7.58  | 5.05  | 20.43 | <0.00001 |
| <b>Perceived Air quality:</b> <i>Somewhat agree</i>                   | 16.77 | 27.27 | 49.85 | <0.00001 |
| <b>Satisfaction with the residential place:</b> <i>Somewhat agree</i> | 3.51  | 4.04  | 35.29 | <0.00001 |

**Table S3c:** Description of the **profile 3** among the oldest ( $\geq 60$  years)

| <b>Variable:</b> <i>modality</i>                                      | Cla/Mod $\phi$ | Mod/Cla $\psi$ | Global $\$$ | <i>p</i> value |
|-----------------------------------------------------------------------|----------------|----------------|-------------|----------------|
| <b>Gender:</b> <i>man</i>                                             | 48.67          | 86.90          | 46.44       | <0.00001       |
| <b>Knowledge about air quality:</b> <i>Yes</i>                        | 64.91          | 44.05          | 17.65       | <0.00001       |
| <b>Family status:</b> <i>With partner without children</i>            | 37.74          | 71.43          | 49.23       | <0.00001       |
| <b>Family status:</b> <i>With partner with children</i>               | 77.78          | 16.67          | 5.57        | <0.00001       |
| <b>Housing:</b> <i>House</i>                                          | 43.96          | 47.62          | 28.17       | <0.00001       |
| <b>Satisfaction with the residential place:</b> <i>Somewhat agree</i> | 40.35          | 54.76          | 35.29       | <0.0001        |
| <b>Level of education:</b> <i>Intermediate</i>                        | 53.13          | 20.24          | 9.91        | <0.001         |
| <b>Level of education:</b> <i>High</i>                                | 47.62          | 23.81          | 13.00       | <0.01          |
| <b>Respiratory health problem:</b> <i>No</i>                          | 30.17          | 83.33          | 71.83       | <0.01          |
| <b>Heating mode:</b> <i>Gas</i>                                       | 30.53          | 69.05          | 58.82       | <0.05          |
| <b>Perceived Air quality:</b> <i>Somewhat agreed</i>                  | 31.06          | 59.52          | 49.85       | <0.05          |
| <b>Heating mode:</b> <i>Other</i>                                     | 0.00           | 0.00           | 4.33        | <0.05          |

|                                                               |       |       |       |          |
|---------------------------------------------------------------|-------|-------|-------|----------|
| <b>Respiratory health problem: Yes</b>                        | 15.56 | 16.67 | 27.86 | <0.01    |
| <b>Satisfaction with the residential place: Totally agree</b> | 19.27 | 44.05 | 59.44 | <0.001   |
| <b>Level of education: Low</b>                                | 8.16  | 4.76  | 15.17 | <0.001   |
| <b>Housing: Apartment</b>                                     | 18.97 | 52.38 | 71.83 | <0.00001 |
| <b>Knowledge about air quality: No</b>                        | 17.80 | 55.95 | 81.73 | <0.00001 |
| <b>Family status: Live alone without children</b>             | 7.19  | 11.90 | 43.03 | <0.00001 |

**Table S3d:** Description of the **profile 4** among the oldest ( $\geq 60$  years)

| <b>Variable: modality</b>                                      | <b>Cla/Mod <sup>‡</sup></b> | <b>Mod/Cla <sup>¥</sup></b> | <b>Global <sup>§</sup></b> | <b>p value</b> |
|----------------------------------------------------------------|-----------------------------|-----------------------------|----------------------------|----------------|
| <b>Level of education: Low</b>                                 | 79.66                       | 45.63                       | 18.27                      | <0.00001       |
| <b>Gender: Woman</b>                                           | 49.13                       | 82.52                       | 53.56                      | <0.00001       |
| <b>Perceived Air quality: Somewhat agree</b>                   | 47.20                       | 73.79                       | 49.85                      | <0.00001       |
| <b>Family status: Live alone without children</b>              | 46.04                       | 62.14                       | 43.03                      | <0.00001       |
| <b>Respiratory health problem: Yes</b>                         | 47.78                       | 41.75                       | 27.86                      | <0.001         |
| <b>Satisfaction with the residential place: Somewhat agree</b> | 42.98                       | 47.57                       | 35.29                      | <0.01          |
| <b>Heating mode: Fuel oil</b>                                  | 55.56                       | 19.42                       | 11.15                      | <0.01          |
| <b>Level of education: High</b>                                | 85.71                       | 5.83                        | 2.17                       | <0.01          |
| <b>Number years living in Lyon : &gt;10 years</b>              | 33.67                       | 98.06                       | 92.88                      | <0.01          |
| <b>Family status: With partner with children</b>               | 5.56                        | 0.97                        | 5.57                       | <0.01          |

|                                                                  |       |       |       |          |
|------------------------------------------------------------------|-------|-------|-------|----------|
| <b>Living in another place:</b> <i>Yes</i>                       | 13.16 | 4.85  | 11.76 | <0.01    |
| <b>Satisfaction with the residential place:</b> <i>Not agree</i> | 0.00  | 0.00  | 4.33  | <0.01    |
| <b>Family status:</b> <i>With partner without children</i>       | 23.27 | 35.92 | 49.23 | <0.01    |
| <b>Respiratory health problem:</b> <i>No</i>                     | 25.86 | 58.25 | 71.83 | <0.001   |
| <b>Level of education:</b> <i>Low</i>                            | 6.12  | 2.91  | 15.17 | <0.00001 |
| <b>Level of education:</b> <i>High</i>                           | 2.38  | 0.97  | 13.00 | <0.00001 |
| <b>Gender:</b> <i>Man</i>                                        | 12.00 | 17.48 | 46.44 | <0.00001 |
| <b>Perceived Air quality:</b> <i>Totally agree</i>               | 2.47  | 1.94  | 25.08 | <0.00001 |

**Table S3e:** Description of the **profile 5** (among the oldest (≥60 years))

| <b>Variable: modality</b>                                        | <b>Cla/Mod <sup>φ</sup></b> | <b>Mod/Cla <sup>¥</sup></b> | <b>Global <sup>§</sup></b> | <b>p value</b> |
|------------------------------------------------------------------|-----------------------------|-----------------------------|----------------------------|----------------|
| <b>Perceived Air quality:</b> <i>Not agree</i>                   | 49.12                       | 80.00                       | 17.65                      | <0.00001       |
| <b>Satisfaction with the residential place:</b> <i>Not agree</i> | 92.86                       | 37.14                       | 4.33                       | <0.00001       |
| <b>Living in another place:</b> <i>Yes</i>                       | 52.63                       | 57.14                       | 11.76                      | <0.00001       |
| <b>Level of education:</b> <i>Low</i>                            | 30.61                       | 42.86                       | 15.17                      | <0.0001        |
| <b>Respiratory health problem:</b> <i>Yes</i>                    | 23.33                       | 60.00                       | 27.86                      | <0.0001        |
| <b>Housing:</b> <i>Apartment</i>                                 | 14.66                       | 97.14                       | 71.83                      | <0.0001        |
| <b>Cardiovascular health problem:</b> <i>Yes</i>                 | 24.24                       | 45.71                       | 20.43                      | <0.001         |
| <b>Family status:</b> <i>Living alone with children</i>          | 50.00                       | 8.57                        | 1.86                       | <0.05          |

|                                                                       |      |       |       |          |
|-----------------------------------------------------------------------|------|-------|-------|----------|
| <b>Level of education:</b> <i>High</i>                                | 0.00 | 0.00  | 13.0  | <0.01    |
| <b>Cardiovascular health problem:</b> <i>No</i>                       | 7.39 | 54.29 | 79.57 | <0.001   |
| <b>Satisfaction with the residential place:</b> <i>Somewhat agree</i> | 4.35 | 20.00 | 49.85 | <0.001   |
| <b>Housing:</b> <i>House</i>                                          | 1.10 | 2.86  | 28.17 | <0.0001  |
| <b>Respiratory health problem:</b> <i>No</i>                          | 6.03 | 40.00 | 71.83 | <0.0001  |
| <b>Perceived Air quality:</b> <i>Totally agree</i>                    | 0.00 | 0.00  | 25.08 | <0.0001  |
| <b>Satisfaction with the residential place:</b> <i>Totally agree</i>  | 3.13 | 17.14 | 59.44 | <0.00001 |
| <b>Living in another place:</b> <i>No</i>                             | 5.02 | 40.00 | 86.38 | <0.00001 |

Legend: <sup>‡</sup> Percentage of individuals with the modality belonging to the profile; <sup>¥</sup> Percentage of individuals of the profile with the modality; <sup>§</sup> Percentage of the modality among the oldest.
